# Supplementary material
Source: PubMed Central journal article supplement (PMC2903667)

## SUPPLEMENTARY FIGURES

Figure S1. (A) cDNA constructs containing various portions of Aurora-B and -C were subcloned into a pEGFP-C1 vector and used for antibody specificity test in B. (B) The cell lysates (20  $\mu$ g) prepared from mouse N2A cells transfected with indicated Aurora-B and Aurora-C constructs were subjected to immunoblotting using anti-GFP, anti-Aurora-B (AIM-1 antibody, BD, Transduction Laboratories), anti-Aurora-C (Tang et al., 2006), or anti- $\beta$ -actin antibodies. (C) Immunofluorescence analysis of endogenous Aurora-B and Aurora-C in TM4 (a testis Sertoli cell line) cells during mitosis. Aurora-B was detected at centromeres at prophase/metaphase, and relocated to the midzone/midbody at anaphase/telophase, a pattern similar to a previous report (Terada et al., 1998). No endogenous Aurora-C was detected in TM cells (D). (E) Chromosome spreads prepared from MI oocytes (8 h post-GVBD) were probed with indicated antibodies and analyzed by confocal fluorescence microscopy. (F-G) Chromosome spreads of MI oocytes (8 h post-GVBD) injected with *GFP-Aurora-B* (F) or *GFP-Aurora-C* (G) mRNAs were immunostained with anti-Aurora-B or anti-Aurora-C antibodies and analyzed by LSM510 laser confocal microscopy.

Figure S2. Effects of ZM447439 on meiotic divisions. GV-intact oocytes were treated with ZM447439 (0-8 $\mu$ M) for 1 h in the presence of IBMX. The oocytes were then cultured in IBMX-free medium and matured *in vitro* in the same concentration of ZM447439 for 6 h or 8 h prior to fixation and analyzed by confocal microscopy. (A) Chromosome misalignment induced by ZM447439 treatment. The mitotic spindle was detected using anti-acetyltubulin antibody and DNA was stained by DAPI. Data are shown as mean  $\pm$  s.d.. (B) ZM447439 induced premature chromosome separation in a dose-dependent manner. Chromosome spreads prepared from ZM447439-treated oocytes (8 h) were fixed and stained with DAPI. For a better view of chromosome morphology (bivalent vs. univalent) in B, the DAPI image was converted to pseudocolor (Black and White). (C) Chromosome spreads prepared from ZM447439-treated oocytes (4 $\mu$ M, 6 h) were fixed and probed

with antibodies against Aurora-C and p-Aurora-C. The large square box in panel C is a blowup of each corresponding smaller dotted box. ZM447439 (4 $\mu$ M) significantly inhibited Aurora-C phosphorylation. The strong red signals detected in ZM447439-treated chromosomes (C-g) are non-specific, since these signals did not localize at centromeres. (D) ZM447439 inhibited 1<sup>st</sup> PBE in a dose-dependent manner. Number of post-injected GVBD oocytes is shown (n). Grouped data from 3 independent experiments.

# Figure S1

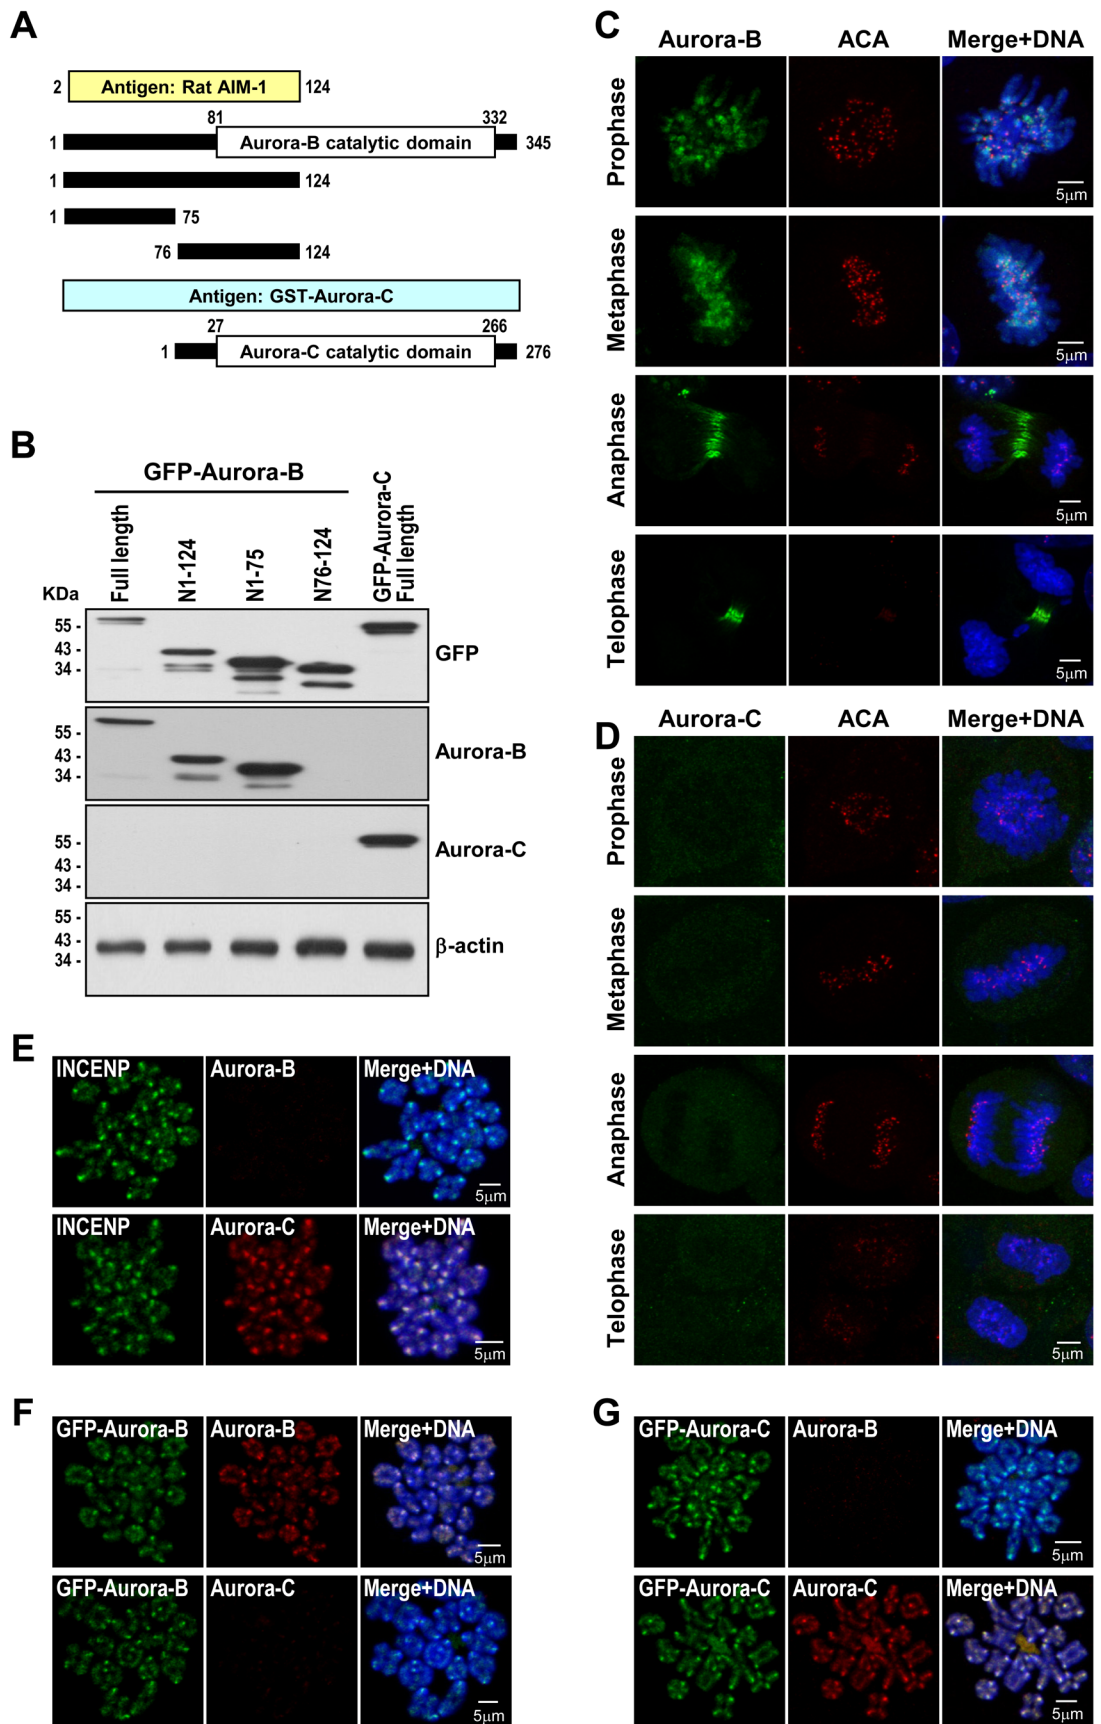

# Figure S2

## A. ZM447439 induces chromosome misalignment

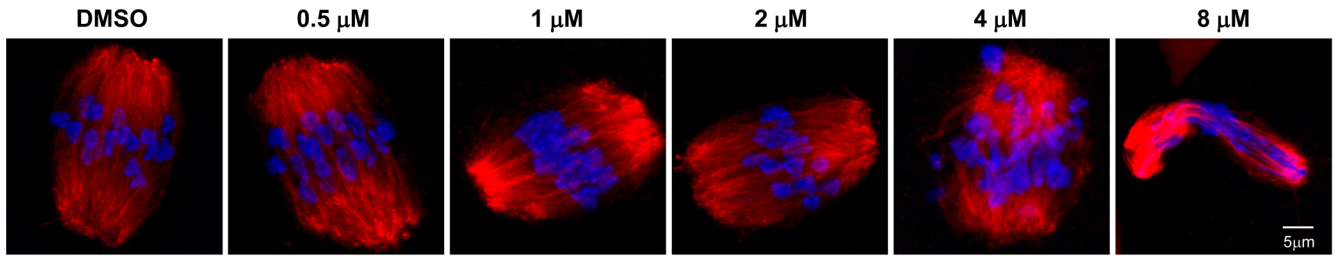

DNA / ac-Tub

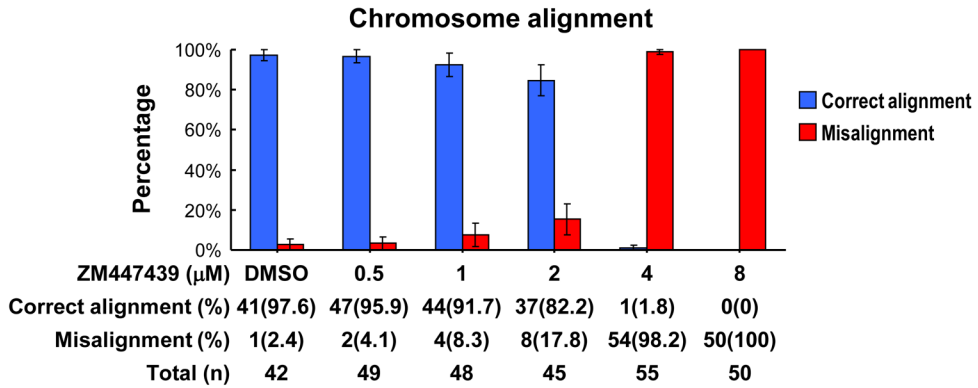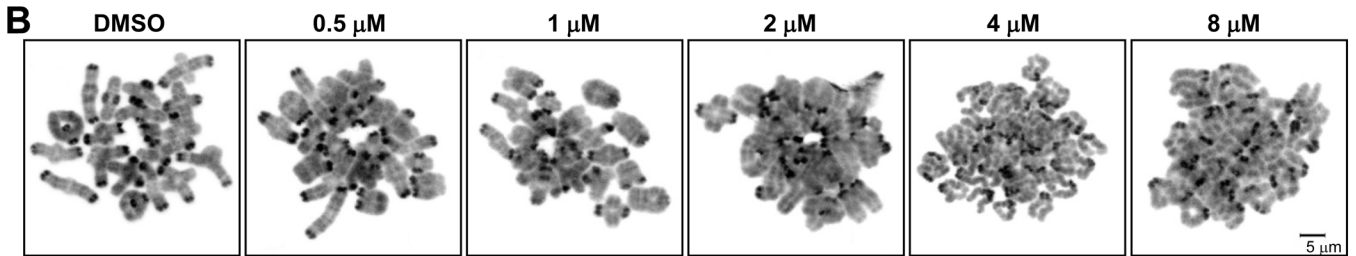

## C. ZM447439 inhibits Aurora-C phosphorylation

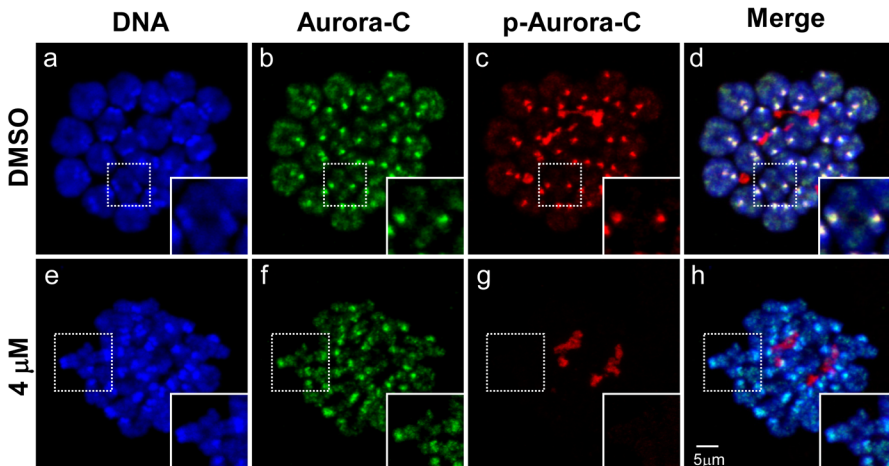

## D. ZM447439 inhibits 1st polar body extrusion

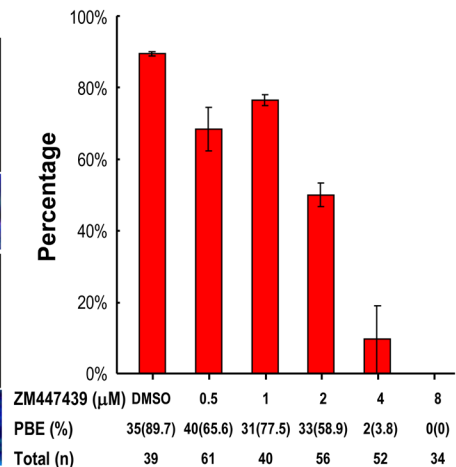

Supplement: E10-02-0170_1.pdf [file E10-02-0170_1.pdf]
